# Supplementary material for: Age-related changes of dental pulp tissue after experimental tooth movement in rats
Source: PeerJ. 2016 Jan 25;4:e1625. doi: 10.7717/peerj.1625 (PMC4741077; doi:10.7717/peerj.1625)
Supplement: Supplemental Information 1 [file peerj-04-1625-s001.xls]

## Sheet: Blad1
histono	ratno	sectionno	Age group	Duration	Age	Group	cemento-enamel junction (CEJ)	cemento-enamel junction (CEJ)	height	height	height	dentin	dentin	dentin	dentin	dentin	dentin	dent	predentin	predentin	predentin	predentin	predentin	predentin	predentin	height	height	height	height	max	max	max	mean
			1=young	( weeks)	(weks)	1 = experimental			knobbel	knobbel	knobbel	cusp	cusp	cusp	cusp	fissure	fissure	fissure	cusp	cusp	cusp	cusp	fissure	fissure	fissure	horn	horn	horn	horn	horn	horn	horn	max
			2=old			2 = control																											horn
									dis	mes	mean	dis	mid	mes	mean	dis	mes	mean	dis	mid	mes	mean	dis	mes	mean	dis	mid	mes	mean	distal	middle	mesial
oud nummer							2	14	3	15		13	9	5		10	6		12	8	4		11	7		16	17	18
nieuwnummer									1	2		3	4	5		6	7		8	9	10		11	12		13	14	15
1006	21	25-75	1	1	7	1	9	21	30	40	35	26.5	16	17	19.8333	14	14	14	0.2	1	0.5	0.566667	0	0.1	0.05	1	-2	-7	-2.66667	4	0.5	-3	0.5
1006	21	100-150	1	1	7	1	7	10	29.5	35	32.25	29	15	16	20	13	13	13		0.8	0.2	0.5	0.2	0	0.1	4	0.5	-3	0.5
1006	21	25-75	1	1	7	2	6.5	12	26.5	33	29.75	28	15	16	19.6667	14.5	14	14.25	0.1	1	0.5	0.533333		0	0	4	2.5	-13	-2.16667	4	2.5	-3	1.16667
1006	21	100-150	1	1	7	2	9	12.5	28	27	27.5	20	15	15	16.6667	14.5	16	15.25	1	1	1	1	0	0.1	0.05	4	0.5	-3	0.5
1007	22	25-100	1	1	7	1																				3	4	-9	-0.666667	4	4	-9	-0.333333
1007	22	25-75	1	1	7	2	10.5	11	35	28.5	31.75	14	12	15	13.6667	11	13	12	1.5	0.8	0.8	1.03333	0	0	0	7	8	1.5	5.5	7	8	6.5	7.16667
1007	22	100-150	1	1	7	2	10	8	35	30	32.5	13	13	15	13.6667	13		13	1	0.8	0.8	0.866667	0	0.1	0.05	7	5	6.5	6.16667
1008	23	100-150	1	1	7	1	7	13	33	40	36.5	16	18	17	17	11	12	11.5	0.5	0.4	1	0.633333	0	0.1	0.05	5	0.5	5.5	3.66667	5	0.5	5.5	3.66667
1008	23	25-75	1	1	7	2	10	7	37	34	35.5	14	15	17	15.3333	12	9	10.5	0.8	1	1	0.933333	0	0.1	0.05	7	5	5	5.66667	7	5	5	5.66667
1008	23	100-150	1	1	7	2		8	39	24	31.5	22	19	20	20.3333	9	5	7	0.2	0.4		0.3	0	0.1	0.05	-5	-1	-3	-3
1009	24	25-75	1	1	7	1	10	7	40	32	36	12	15	20	15.6667	11		11	1	1	1.2	1.06667	0.1		0.1	0.5	3	3	2.16667	7	6	5	6
1009	24	100-150	1	1	7	1	11	6.5	38	33	35.5	13	15	17	15	15	11	13	1	1	0.9	0.966667	0.1	0.1	0.1	7	6	5	6
1009	24	70-90	1	1	7	2	12	10	34	36	35	16	15	14	15	12	14	13	1	1	1	1	0.8	1.2	1	6	5	5	5.33333	7	7	6	6.66667
1009	24	10-36-54	1	1	7	2	5		32	36	34	20	13	14	15.6667		12	12	1	1.1	0.8	0.966667		0	0	7	7	6	6.66667
1010	25	25-100	1	1	7	1	14	7	37	25	31	16	24	16	18.6667	12	11	11.5	1	1	1	1	0.1	0	0.05	2	-3	6	1.66667	2	-3	6	1.66667
1010	25	25-75	1	1	7	2		11		35	35	21	12	12	15	13	15	14	1	1	1	1	0		0		6	-3	1.5	6	6	6	6
1010	25	100-150	1	1	7	2	7	12	31	37	34	11	13	15	13	14	13	13.5	0.8	1	1	0.933333	0.1	0	0.05	6	5.5	6	6
1021	26	25-75	1	2	8	1		7		30	30	17	16		16.5	15	14	14.5	0.7	0.5		0.6	0	0.1	0.05		-2	-1	-1.5		-2	-1	-1.5
1021	26	25-75	1	2	8	2	6		28	32	30	19	16	15	16.6667	11	13	12	0.1	0.5	0.1	0.233333	0.3	0	0.15	3	-2	-4	-1	3	-2	-4	-1
1022	27	0-25	1	2	8	1	7		25		25	13	17	22	17.3333	5	10	7.5	0	0.5	0.2	0.233333	0	0	0					9.5	2	-4.5	2.33333
1022	27	50-75	1	2	8	1	10	7	32	31.5	31.75	14	14	17	15	12	12	12	1	0.2	1	0.733333	0	0	0	9.5	2	-4.5	-1.25
1022	27	11-23-29-41	1	2	8	2	6	13	29	28	28.5	14	14	12	13.3333	15	15	15	0.5	1	1	0.833333	0.5	0.1	0.3	8	3	-3	2.66667	8	3	-2	3
1022	27	50-60-75-90	1	2	8	2		11	30	31	30.5	14	17	14	15	12	14	13	1	0.5	0.8	0.766667	0.1	0.2	0.15	6	1.5	-2	1.83333
1023	28	50-100	1	2	8	1	10	6	33	27	30	14	14	18	15.3333	12	12	12	0.8	0.75	1	0.85	0	0	0	6	5.5	1	4.16667	6	5.5	1	4.16667
1023	28	10-25-30-40	1	2	8	2	7.5		32	30	31	17	14	13	14.6667	16	15	15.5	1	1	1	1	0	0	0	9	5	3	5.66667	9	5	4.5	6.16667
1023	28	50-60-70-80	1	2	8	2	9		28	33	30.5	16.5	15	15	15.5	14	15	14.5	1	1	1	1	0	0	0	4	4	4.5	4.16667
1024	29	2025-10-01	1	2	8	1	6		31	31	31		13	12	12.5		10	10		1	1	1		0.1	0.1	2	2	5	3	2	2	5	3
1024	29	50-100	1	2	8	1	6	14	26	35	30.5	16	18	17	17	12	13	12.5	1	1	1	1	0.5	0.1	0.3
1024	29	75-100-110-120	1	2	8	2	12	8	35	30	32.5	10			10	16	14	15	1	1	1	1	0.5	0.2	0.35	6	6	10	7.33333	6	6	10	7.33333
1025	30		1	2	8	1																					4	4.5	4	5.5	5	4.5	5
1025	30	50-75	1	2	8	1	8	11	30	37	33.5	16	8	11	11.6667	14	15	14.5	1	1	1	1	0.1	0.1	0.1	5.5	5	2	4.16667
1025	30	20-60	1	2	8	2			33	28	30.5	12	12	16	13.3333	15	13	14	1	1	1	1	0	0	0	10	4.5	2	5.5	10	5.5	3	6.16667
1025	30	80-75-100-125	1	2	8	2				24	24	7	12	17	12	15	14	14.5	1	1	1	1	0	0.1	0.05	5	5.5	3	4.5
1011	11	25-75	1	4	10	1		8	33	30	31.5	15	13	19	15.6667	15	16	15.5	1.1	1.1	1	1.06667	0	0	0	5	5	-3	2.33333	5	5	-3	2.33333
1011	11	25-75	1	4	10	2	8	9	28	32	30	15	14	13	14	14.5	16	15.25	1	1	1	1	0.5	0.1	0.3	5	3	2	3.33333	5	3	2	3.33333
1012	12	25-75	1	4	10	1		10	34	30	32	15	16	20	17	17	16	16.5	1	1	1	1	0		0
1012	12	25-50	1	4	10	2	5		25		25		18	18.5	18.25		9	9			1	1		0.5	0.5	2	1		1.5	4	2	-4	0.666667
1012	12	75-100	1	4	10	2	6.5	11	28	36	32	21	17	15	17.6667	8	15	11.5	1	1		1	1.1	0	0.55	4	2	-4	0.666667
1013	13	25-75	1	4	10	1		8	29	30	29.5	15	18		16.5	12		12	1	1.8		1.4	0		0	3	4		3.5	3	4	-3	1.33333
1013	13	100-150	1	4	10	1	10	6	32	2.8	17.4	11.5		19	15.25	14	14	14		1.7		1.7	0	0.2	0.1	2.5	2	-3	0.5
1013	13	75-100	1	4	10	2	7	12	28	30	29	25	14	14	17.6667	9	17	13	1	1	0.8	0.933333	0.2	0.1	0.15	3	2	-6.5	-0.5	3	2	-1	1.33333
1013	13	125-150	1	4	10	2	6	10	26	32	29	18	18	18	18	16	18	17	0.5	0.5	1	0.666667	0.1	0.2	0.15	1	-2	-1	-0.666667
1014	14	25-75	1	4	10	1	7	12	28	37	32.5	17	13	15	15	14	13.5	13.75	0.75	1	1	0.916667	0	0	0	2	4	2	2.66667	2	4	2	2.66667
1014	14	25-75	1	4	10	2	7.5	7	35	30	32.5	12	13	15	13.3333	15	13	14	1	1	1	1	0	0.1	0.05	7	4	4	5	7	4	4	5
1014	14	100-150	1	4	10	2		6	34	24	29	18	15		16.5	11	7	9	1	1		1	0.4	0	0.2	-1	-1.5	-5	-2.5
1015	15	25-75	1	4	10	1	6	11	29	34	31.5	16	14	15	15	12	12	12	0.2	1	1	0.733333		0	0	2	5	4	3.66667	2	5	4	3.66667
1015	15	25-75,125	1	4	10	2	17	8	33	28	30.5	13	29	20	20.6667	14	12	13	1	0.5	1	0.833333		0	0	0.5	-3	1.5	-0.333333	0.5	-3	1.5	-0.333333
1029	2	25-75	1	8	14	1	8	15	29	33	31	23	14	13	16.6667	14	17	15.5	1	1	1	1	0	0.1	0.05	1	3	-4	0	1	3	-4	0
1029	2	75,100,106	1	8	14	2	13	7.5	37.5	25	31.25	13	18	25	18.6667	17	12.5	14.75	0.25	1	0.75	0.666667	0.1	0.1	0.1	-2	3	-1	0	-2	3	-1	0
1017	1	25-75	1	8	14	1	9	7	33	27	30	14	14	19	15.6667	15	13	14	1	1.2	1	1.06667	0.1	0.1	0.1	3.5	1	-1	1.16667	5	9	6	6.66667
1017	1	100-150	1	8	14	1																				5	9	6	6.66667
1018	7	10-20-30-40	1	8	14	2																				7	7	-1	4.33333	7	7	0.5	4.83333
1018	7	50-80	1	8	14	2	9	6	34	32	33	14	13	15	14	15	13	14	1	1.1	1	1.03333	0	0.1	0.05	5	6	0.5	3.83333
1018	7	25-40-50-60	1	8	14	2		6		29	29	12	13		12.5	14	14	14	1	0.75		0.875	0	0.1	0.05
1019	8	50-75-85	1	8	14	1	8	11	35	38	36.5	16	14	15	15	14	14.5	14.25	1	1	0.75	0.916667	0.2	0	0.1	8	5	5	6	8	5	5	6
1019	8	70-80-90-100	1	8	14	2		6		28	28	22.5	21		21.75	8		8	1.1	1.2		1.15	0.5	0.1	0.3					7	4	-4	2.33333
1111	17	10-20-30-40	1	8	14	2	12	9	32	28	30	13	13.5	19	15.1667	17	17	17	1	0.75	1	0.916667	0.1	0.2	0.15	7	3	-4	2
1111	17	50-75-90-100	1	8	14	2	8	10	43	28	35.5	8	13	19	13.3333	17	17	17	1	1	1	1	0.1	0.2	0.15	5	4	-4	1.66667
1020	19	50-125	1	8	14	1	6	12	29	33	31	17	15	20	17.3333	16	17	16.5	1	1.2	1.1	1.1	0.1	0.1	0.1	-1	0.5	3	0.833333	-1	0.5	3	0.833333
1020	19	15-25-35-50	1	8	14	2		7	28	28	28	14	19		16.5	11		11	1.1	1.2		1.15	0.1		0.1
1020	19	75-100-120-140	1	8	14	2		7.5		29	29	14.5	14	16.5	15	15.5	15	15.25	1	1.1	1.2	1.1	0	0	0
1112	16	25-75	1	12	18	1		9		32	32	16	15	20	17	18	16	17	1	0.5	0.5	0.666667	0.1	0	0.05
1112	16	010-40	1	12	18	2	8		28	35	31.5		14	14	14		14	14		1	1	1		0.1	0.1	5	1		3	5	2	2	3
1112	16	50-125	1	12	18	2	10	14	28	36	32	18	14	14	15.3333	14	17	15.5	0.8	1	1	0.933333	0.1	0.1	0.1	3	2	2	2.33333
1113	16	001-75	1	12	18	1	12	10	35	32	33.5	13	16	17	15.3333	18	18	18	1	1	0.75	0.916667	0	0.2	0.1	4	3	2	3	4	3	2	3
1113	16	9-20-27-41	1	12	18	2																				2.5	-0.5	-6	-1.33333	5	-0.5	-5	-0.166667
1113	16	50-60-80-100	1	12	18	2	10		29		29		19	13.5	16.25	19.5	19	19.25	0.8	0.75	0.5	0.683333	0.4	0.1	0.25	5	-0.5	-5	-0.166667
1106	3	50-75	1	12	18	1	8	10	30	34	32	18.5	12	12	14.1667	10	15	12.5	0.8	1	0.75	0.85	0.1	0	0.05	5	4	0.5	3.16667	5	4	2	3.66667
1106	3	100-150	1	12	18	1	6	10	26	35	30.5	17	14	16	15.6667	12	12	12	0.5	0.5	1	0.666667	0.1	0.2	0.15	1.5	4	2	2.5
1106	3	25--75	1	12	18	2	5	7	28	35	31.5	17.5	12	11	13.5	11	12	11.5	0.5	0.5	0.5	0.5	0.1	0.2	0.15	8	3	0.5	3.83333	8	5.5	0.5	4.66667
1107	4	25-75	1	12	18	1	9		30	34	32		13	15	14		15	15		1.2	1	1.1		0	0	3	5.5		4.25
1107	4	5,15,25,35	1	12	18	2	11	6	33	23	28	15	12.5		13.75	13		13	1	0.5	1.1	0.866667	0.1		0.1	2	3	1	2	5	5	3	4.33333
1107	4	50-100	1	12	18	2	8	9	28	34	31	16	14	11	13.6667		11.5	11.5	0.8	0.5	0.8	0.7	0.1	0.1	0.1	5	5	3	4.33333
1108	5	50-75	1	12	18	1	10	11	37	36	36.5	18	16	16	16.6667	14	18	16	0.8	1	1	0.933333	0.4	0.2	0.3	7	5	4	5.33333	7	5	4	5.33333
1108	5	25-75	1	12	18	2	7	11	34	38	36	17	13.5	12.5	14.3333	8	10	9	0.2	1	0.75	0.65	0.1	0.1	0.1	5.5	5	6	5.5	5.5	6	9	6.83333
1108	5	25-35-45-55	1	12	18	2	8.5	11	36	41	38.5	20	15	13	16	14	17	15.5	1	1	1	1	0.1	0.1	0.1	5	6	5.5	5.5
1108	5	65-75-100-125	1	12	18	2	8.5	12	34	40.5	37.25	18	16	19	17.6667	13	17	15	1	1	0.5	0.833333	0.1	0.1	0.1	2	6	9	5.66667
1109	6	25-75	1	12	18	1	8	12	30		30		15	13	14	12	18	15		1	0.1	0.55	0.1	0	0.05	3	4		3.5	4	4		4
1109	6	100-150	1	12	18	1	9	20	34	34	34	14		17.5	15.75	12.5	16	14.25	0.1	1	1	0.7	0.1	0.1	0.1	2	0.5		1.25
1109	6	1-15-25-50-75	1	12	18	2		11		44	44	19	14		16.5	16	15	15.5	1	1		1	0.2	0.1	0.15		5	2	3.5	3	5	3	3.66667
1110	10		1	12	18	2	9		35		35		13	16	14.5	15.5	17	16.25	1.2	1	1	1.06667	0.2	0.1	0.15	3	4		3.5
1110	10	50-80	1	12	18	2	10	13	34	32	33	19	13	18.5	16.8333	19.5	17	18.25	1	1	1	1	0.1	0.1	0.1	3	3.5	3	3.16667
1125	56	25-75	2	1	41	1	12	7	16	25	20.5	7	10	4	7	13	15	14	1	2	0.5	1.16667	0.5	0.5	0.5	1	1.5	-2	0.166667	1	1.5	3	1.83333
1125	56	100-150	2	1	41	1																				0.5	-4.5	-5	-3
1126	57	25-75	2	1	41	1	9	6	15	15	15	12	7.5	3	7.5	14	13	13.5	0.75	1	0.1	0.616667	0.1	0.1	0.1	-5	-2	3	-1.33333
1126	57	25-75	2	1	41	2	8	12	15	14	14.5	8	2.5	6	5.5	15	15	15	1	1	1	1	0.5	0	0.25	0.5	1	5	2.16667	0.5	1	5	2.16667
1126	57	100-150	2	1	41	2	8	10	15	20	17.5	3.5	6	5	4.83333	13.5	14	13.75	0.5	1	1	0.833333	0.2	0.1	0.15	-0.3	-1	-0.2	-0.5
1127	58	7-25-50	2	1	41	1	8	12	18	22	20	4	4.5	6.5	5	16	13.5	14.75	1	1	1	1	0.5	0.5	0.5	-1	1	-1	-0.333333	1	1	0.2	0.733333
1127	58	75-125	2	1	41	1	8.5	20	20	22	21	8	11	8	9	12	13.5	12.75	0.1	1	1	0.7	0.2	0.5	0.35	1	-4	0.2	-0.933333
1127	58	75-100-125	2	1	41	2																				-2	-3	-1	-2	-2	-3	-1	-2
1128	59	6-25-50	2	1	41	1																				4	1	-4	0.333333	4	1	3	2.66667
1128	59	75-125	2	1	41	1	8	12	15.5	16	15.75	1.5	3	2	2.16667	16	12	14	1	1	1	1	0.1	1.2	0.65	3.5	0.5	3	2.33333
1128	59	14-25-75	2	1	41	2																				2.5	-0.1	-6	-1.2	2.5	-0.5	2	1.33333
1128	59	100-150	2	1	41	2	13	8	12	15	13.5	4	2.5	2	2.83333	16	13	14.5	1	1	1	1	0.1	0.3	0.2	0.5	-0.5	2	0.666667
1142	60	25-75	2	1	41	1		10		18	18	8	11		9.5	15		15	1	0.5		0.75	0.5		0.5
1142	60	75-125	2	1	41	2	7	11	20	25	22.5	10	6	9.5	8.5	16.5	14	15.25	1	0.75	1.2	0.983333	0.5	0.2	0.35	1	1	-3	-0.333333	1	1	-3	-0.333333
1114	46	25-75	2	2	42	1	11.5	8	15	18	16.5		4	3	3.5	15	16	15.5	1	1	1	1	0.1	0.1	0.1	-1	-3	-1	-1.66667	-1	-1	1	-0.333333
1114	46	100-150	2	2	42	1	12	6	25	14	19.5	10	4	1	5	14	14	14	1	1	1	1	0.1	0.1	0.1	-2	-1	1	-0.666667
1114	46	25-100	2	2	42	2	8	13	23	12	17.5	2	7	12	7	14	15	14.5	1.5	1	1	1.16667	0.1	0.1	0.1	-2	0.5	4	0.833333	-2	0.5	4	0.833333
1115	47	25-75	2	2	42	1	12	8	23	26	24.5	10	10	13	11	15	16	15.5	1	0.8	1	0.933333	0.2	0.1	0.15	-3	-4	-1	-2.66667	-3	-4	-1	-2.66667
1115	47	25-50	2	2	42	2	8	11	17	18	17.5	11	4	3	6	17.5	14	15.75	1	1.1	1	1.03333	0	0.1	0.05	2	-2	-5	-1.66667	2	-1	-2	-0.333333
1115	47	75-100	2	2	42	2	8	13	15.5	22	18.75	7	4	6	5.66667	16	14	15	1	1	1	1	0.1	0.1	0.1	-1	-1	-2	-1.33333
1116	48	100-150	2	2	42	1	0	9	21	18	19.5	11	14	7	10.6667	14	14	14	1	1	0.1	0.7	0	0	0	3	-3	-0.5	-0.166667	3	-3	-0.5	-0.166667
1116	48	25-100	2	2	42	2	9	10	19.5	12	15.75	6	4	6	5.33333	15	16	15.5	0.1	2	1	1.03333	0.1	0.1	0.1	-0.5	1	0.5	0.333333	-0.5	1	0.5	0.333333
1117	49	001-25	2	2	42	1	9		21		21		4	13	8.5	15	15	15		1	1	1	0	0.5	0.25	-5	0.5		-2.25	-0.5	0.5	-1	-0.333333
1117	49	50-75	2	2	42	1	8.5	14	23	15	19	4	7	9	6.66667	14.5	18	16.25	1	1	0.75	0.916667	0.2	0.75	0.475	-0.5	-2	-1	-1.16667
1117	49	0010-40	2	2	42	2	12	9	14	23	18.5	4.5	5	2.5	4	17	14	15.5	0.75	1	0.5	0.75	0.1	1	0.55	2	-4	-1	-1	3	-4	-1	-0.666667
1117	49	50-60-75-100	2	2	42	2	10	11	26	20	23	6	9	4	6.33333	16	15	15.5	1	1	1	1	0.1	1	0.55	3	-4	-5	-2
1118	50	001-25	2	2	42	1																				0.5	-1		-0.25
1118	50	50-75	2	2	42	1	10.5	12	21	13	17	4.5	3.5	5	4.33333	16	17	16.5	0.5	1	0.75	0.75	0.5	0.5	0.5	4	0.5	-4	0.166667	4	0.5	-4	0.166667
1118	50	10-25-60-75	2	2	42	2	12.5	8	18	17	17.5	6	5	4.5	5.16667	16	16	16	1	0.75	0.75	0.833333	0.1	0.1	0.1	-1	-0.2	-0.5	-0.566667	-0.5	1	-0.5	0
1118	50	20-30-40-50	2	2	42	2	13	8	16	19	17.5	5	3	5.5	4.5	17	17	17	0.5	0.5	0.5	0.5	0.1	0.5	0.3	-1	1	-3	-1
1118	50	60-70-80-90	2	2	42	2	12	11	20	18	19	7	6	4	5.66667	16	15	15.5	0.5	0.5	0.5	0.5	0.1	0.1	0.1	-3	-5	-0.5	-2.83333
1118	50	100-150-160-170	2	2	42	2		8	16	15	15.5	14	10	9	11	13	12	12.5	0.1	0.1	0.1	0.1	0.1	0.1	0.1	-0.5	-3	-6	-3.16667
1135	37	25-75	2	2	42	2	10	7	6	20	13	13	6	4	7.66667	15	13	14	1	0.75	0.5	0.75	0.1	0.5	0.3	-1	-3	-3	-2.33333
1139	53	5,10,15,20	2	4	44	1	8	1	22	13	17.5	4.5	3	5	4.16667	9	12	10.5		0.75	0.5	0.625	0.1	0.1	0.1	2	4	7	4.33333	2	4		3
1139	53	25-100	2	4	44	1	4	6	21	17	19	5	6	7	6	6	5	5.5	0.5	1	0.5	0.666667	0.1	0.1	0.1	-4	4	13	4.33333
1139	53	50-100	2	4	44	2	7.5		23		23			4.5	4.5		10	10			0.5	0.5
1140	54	001-25	2	4	44	1	8	11	20	20	20	6.5	7	9	7.5	12	18.5	15.25	0.75	1	0.5	0.75	0.5	0.75	0.625	-2	-3	1	-1.33333	-2	-3	1	-1.33333
1140	54	010-50	2	4	44	2	11	9	15	19	17	11.5	4	7	7.5	7	16	11.5	0.75	1		0.875	1	0.5	0.75	-2	-2	-2	-2
1141	55	001-25	2	4	44	1	8	10	27	23	25	7.5	4	10	7.16667	10	13.5	11.75	0.8	0.5	1	0.766667	0.75	0.5	0.625	5	0.5	-2	1.16667	5	0.5	-2	1.16667
1141	55	5-10-20-30-40	2	4	44	2	11	8	24	21	22.5	5	4	8	5.66667	13	12	12.5	0.5	1	1	0.833333	0.5	1	0.75	3.5	3	2.5	3	3.5	3	2.5	3
1141	55	50-60-75-100	2	4	44	2	18	9	24	18	21	16	7.5	18	13.8333	8	11	9.5	1	1	0.5	0.833333	1	0.5	0.75
1119	41	100-150	2	8	48	1	9	8	25	19	22	20	12	8	13.3333	8	8	8	0.1	1	0.2	0.433333	0.1	0.75	0.425	-6	-2	-2	-3.33333	-6	-2	-2	-3.33333
1119	41	225-275	2	8	48	2	8	8	20	18	19	13		8	10.5		10	10	1		1	1	1	1	1			-3	-3	-2	-0.5	4	0.5
1120	42	25-100	2	8	48	2	6.5	8	15	18.5	16.75	18	7.5	8	11.1667	10	10	10	0.5	0.75	0.2	0.483333		1	1	-2	-0.5	4	0.5
1121	43	100-150	2	8	48	1	11.5	8	19	19	19	17	4	8	9.66667	12	15	13.5	1	1	1	1	0.5	0.2	0.35	1	-0.5	-4	-1.16667	1	-0.5	-4	-1.16667
1121	43	100-150	2	8	48	2	8	13	16	20	18	4	4	10	6	18	16	17	1	1	0.5	0.833333		0.2	0.2
1122	44	001-25	2	8	48	1	6	15	23	15	19	11	4	7	7.33333	7	11	9	0.1		0.75	0.425		0.5	0.5	6	4	-5	1.66667	6	4	-0.2	3.26667
1122	44	50-75	2	8	48	1	7	13	23	20	21.5	7	4	6.5	5.83333	13	12	12.5	0.5	1	1	0.833333	0.1	0.5	0.3	5	3	-0.2	2.6
1122	44	0010-40	2	8	48	2	13	8	15	18	16.5	5	3.5	9	5.83333	13	13	13	0.75	1	1	0.916667		0.2	0.2	2	2	-3	0.333333	5	3	0.5	2.83333
1122	44	50-75-100	2	8	48	2	13	7.5	20	18	19	5.5	3	5	4.5	13	13	13	1	1	1	1	0.1	0.1	0.1	4	3	0.5	2.5
1122	44	120-130-140	2	8	48	2		9		19	19	10	6	3	6.33333	7.5	7	7.25	1	1	1	1	1	1	1	4	-1.5	-7	-1.5
1122	44	150-160-170	2	8	48	2	10	12	23	19	21	0	2	6	2.66667	0		0	0	1	0.2	0.4	0		0	5	1.5		3.25
1123	45	50-125	2	8	48	1	6.5	0	17	0	8.5	0	10	15	8.33333	0	14	7	0	1	1	0.666667	0	0.1	0.05	7	1	-8	0	7	1	-8	0
1123	45	10-20-30-40	2	8	48	2	0	6	22	18	20	14	17	0	10.3333	15	0	7.5	1	1	0	0.666667	0.1	0	0.05	1.5	1		1.25	4	3	4	3.66667
1123	45	50-60-70-80	2	8	48	2	9	6	15	12	13.5	12	12	18	14	19	16	17.5	1	1	1	1	0.1	0.1	0.1	4	3	0.5	2.5
1123	45	90-120	2	8	48	2																				3	2.5	1	2.16667
1123	45	25-75	2	8	48	2	11	6	21	20	20.5	8	3	6	5.66667	7	14	10.5	1	1	0.1	0.7	0.1	0.1	0.1
1129	31	75-100-125	2	12	52	2	6	6	15	15	15	13	24	20	19	15	8	11.5	0.5	0.4	0.1	0.333333	0	0	0	-6	-4	4	-2
1129	31	150-175	2	12	52	2
1130	32	5-25-50	2	12	52	1	10	4.5	15	12	13.5	7	6	13	8.66667	17	15	16	1.2	1.1	1	1.1	0	1	0.5	5.5	4	4	4.5	5.5	4	4	4.5
1130	32	10-25-50	2	12	52	2	5	7	10	10	10	10	17	20	15.6667	12	10	11	1.5	1.5	1.5	1.5	0.2	1	0.6	4	2.5	-3	1.16667	4	2.5	-3	1.16667
1130	32	25-75	2	12	52	2				10	10			15	15	10	14	12	1.5	1.5	1.5	1.5	0.5	1	0.75	2.5	-0.2	-4	-0.566667
1132	34	25-100	2	12	52	1	4	5	10	10	10	14	20	12	15.3333	15	15	15	0.75	1	0.2	0.65	0.5	0	0.25	1	-1	5	1.66667	1	-1	5	1.66667
1132	34	25-75	2	12	52	2	2	3	4	6	5	18	23	23	21.3333	17	14	15.5	1	1	2	1.33333	0.1	0.1	0.1
1133	35	25-75	2	12	52	1	5	3	10	2	6	12	14	15	13.6667	16	16	16	1	1	1	1	0.5	0.1	0.3	0.5	1.5	3	1.66667	0.5	1.5	3	1.66667
1133	35	25-75	2	12	52	2	4	4	10	3	6.5	12	7		9.5	16	10	13	1.5	0.5		1	0.5	1	0.75	2	4	2	2.66667	7	4	3	4.66667
1133	35	100-150	2	12	52	2																				7	1	0.5	2.83333
1134	36	10-20-30-40	2	12	52	2	5	7	2	5	3.5	10	5	6	7	15	18	16.5	1	1	1	1	1	0.5	0.75	-1	2	3	1.33333
1136	39	125-175	2	12	52	1	4	2	4	2	3	13	9	4	8.66667	14		14	1.5	1.5		1.5	1		1		6	1	3.5		6	1	3.5
1136	39	5,15,25,50,75	2	12	52	2																				3	-4	2.5	0.5	3	-4	2.5	0.5
